# Supplementary material for: Proton Transport Along Fluorite Oxide-Ion Conductor: Unveiling Abnormally High Conduction Characteristics and Synergistic Mechanisms
Source: Research Square preprint supplement (doi:10.21203/rs.3.rs-3120920/v1), 2023-07-21
Supplement: Supplementary file 1 [file d9cadb7639579fa39d5dd610.docx]

SUPPLEMENTARY INFORMATION

Table of Contents

[Supplementary Fig. 1 2](#_Toc137911410)

[Supplementary Fig. 2 3](#_Toc137911411)

[Supplementary Fig. 3 4](#_Toc137911412)

[Supplementary Fig. 4 5](#_Toc137911413)

[Supplementary Fig. 5 6](#_Toc137911414)

[Supplementary Fig. 6 7](#_Toc137911415)

[Supplementary Fig. 7 8](#_Toc137911416)

[Supplementary Fig. 8 9](#_Toc137911417)

[Supplementary Fig. 9 10](#_Toc137911418)

[Supplementary Fig. 10 11](#_Toc137911419)

[Supplementary Fig. 11 12](#_Toc137911420)

[Supplementary Fig. 12 13](#_Toc137911421)

[Supplementary Fig. 13 14](#_Toc137911422)

[Table S1 15](#_Toc137911423)

[Table S2 16](#_Toc137911424)

[Table S3 17](#_Toc137911425)

[Table S4 18](#_Toc137911426)

[Table S5 19](#_Toc137911427)

[Table S6 20](#_Toc137911428)


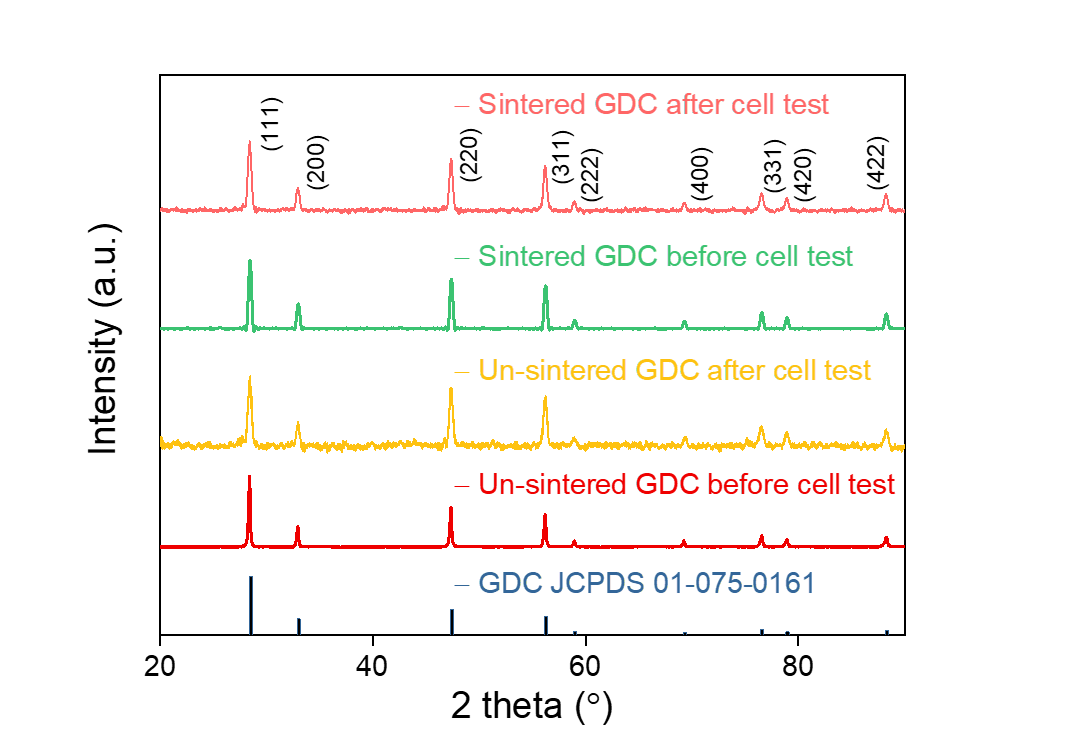


**Supplementary Fig. 1**. X-ray diffraction patterns of sintered Gd0.1Ce0.9O2-δ (GDC) after cell test, sintered GDC before cell test, un-sintered GDC after cell test, un-sintered GDC before cell test and standard card of pure GDC (JCPDS 01-075-0161). No new diffraction peaks are observed after sintering and cell test, and the four diffraction peaks are as same as the standard card. This shows GDC is stable under sintering process and fuel cell operation atmosphere.


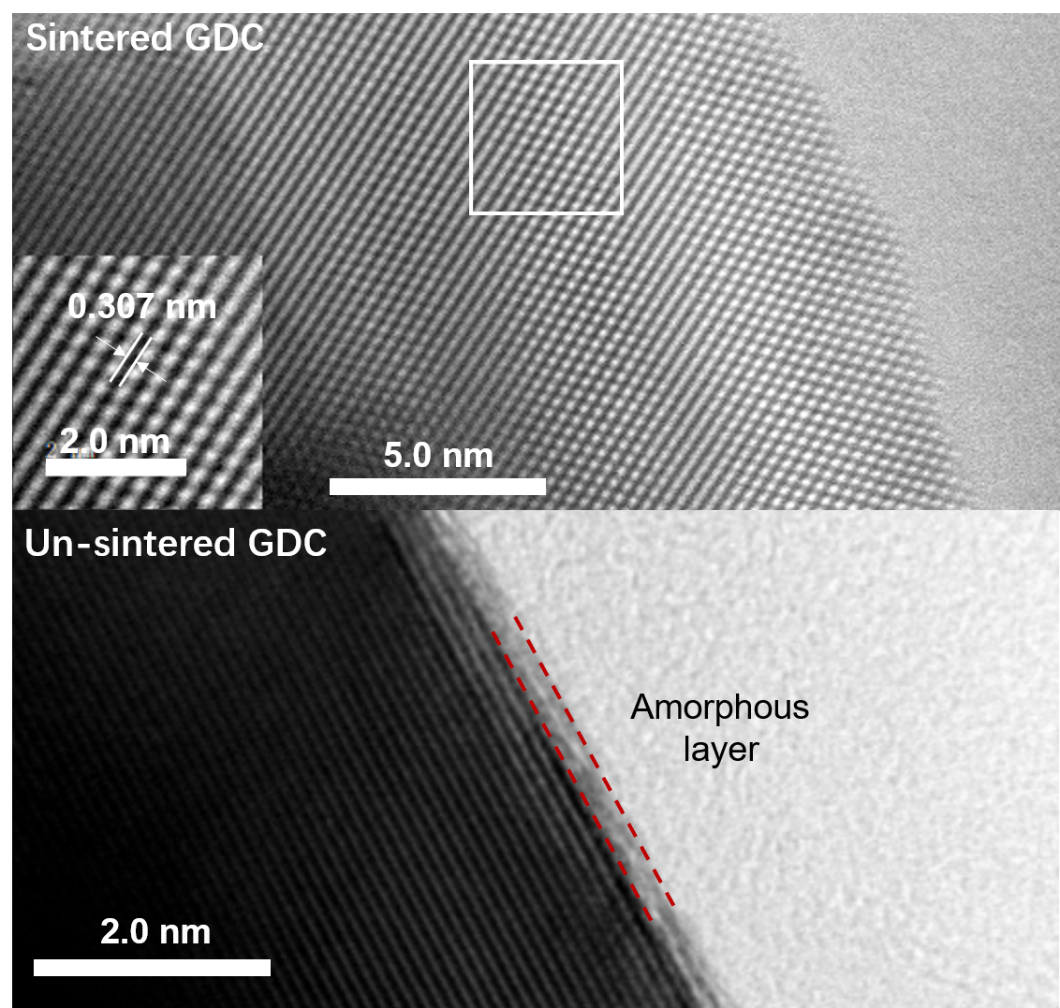


**Supplementary Fig. 2**. HR-TEM of sintered GDC and un-sintered GDC.


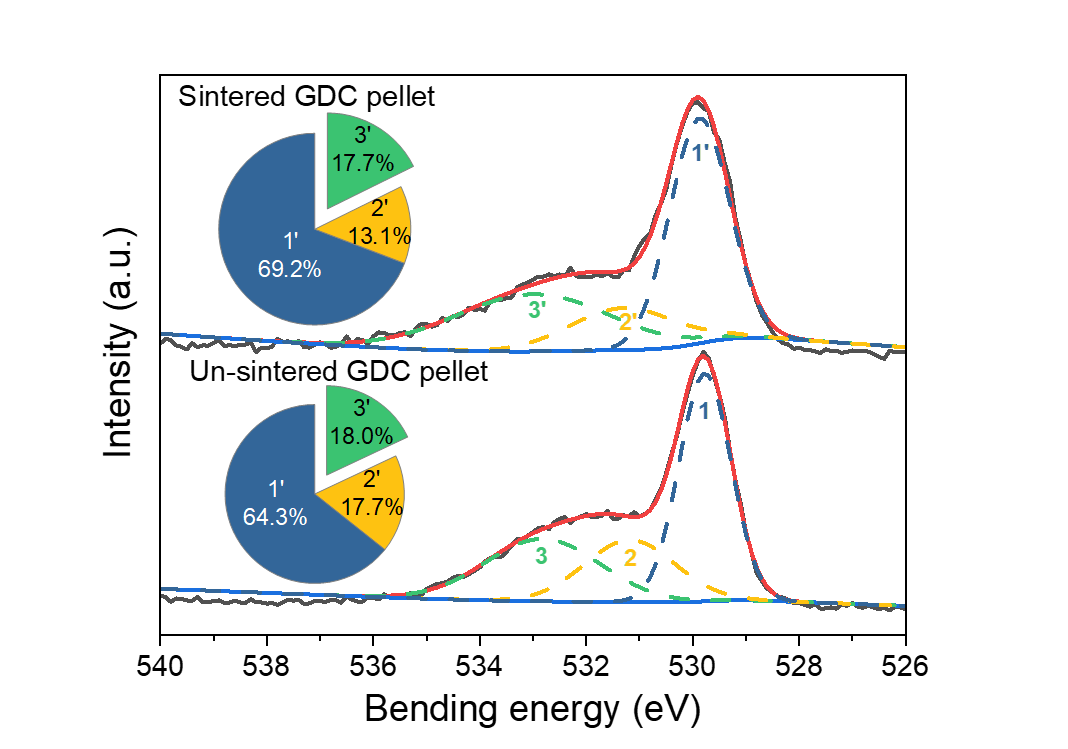


**Supplementary Fig. 3**. O 1s peaks of sintered GDC pellet and un-sintered GDC pellet. Curve 1’ and 1 represent lattice oxygen. Curve 2’ and 2 represent O2- ions neighboring to oxygen vacancy (VO). Curve 3’ and 3 represent chemisorbed oxygen species. Pie charts represent area percentage of the three kind of oxygen on the surface of GDC pellets. The location information of the specific peaks is summarized in Table S1.


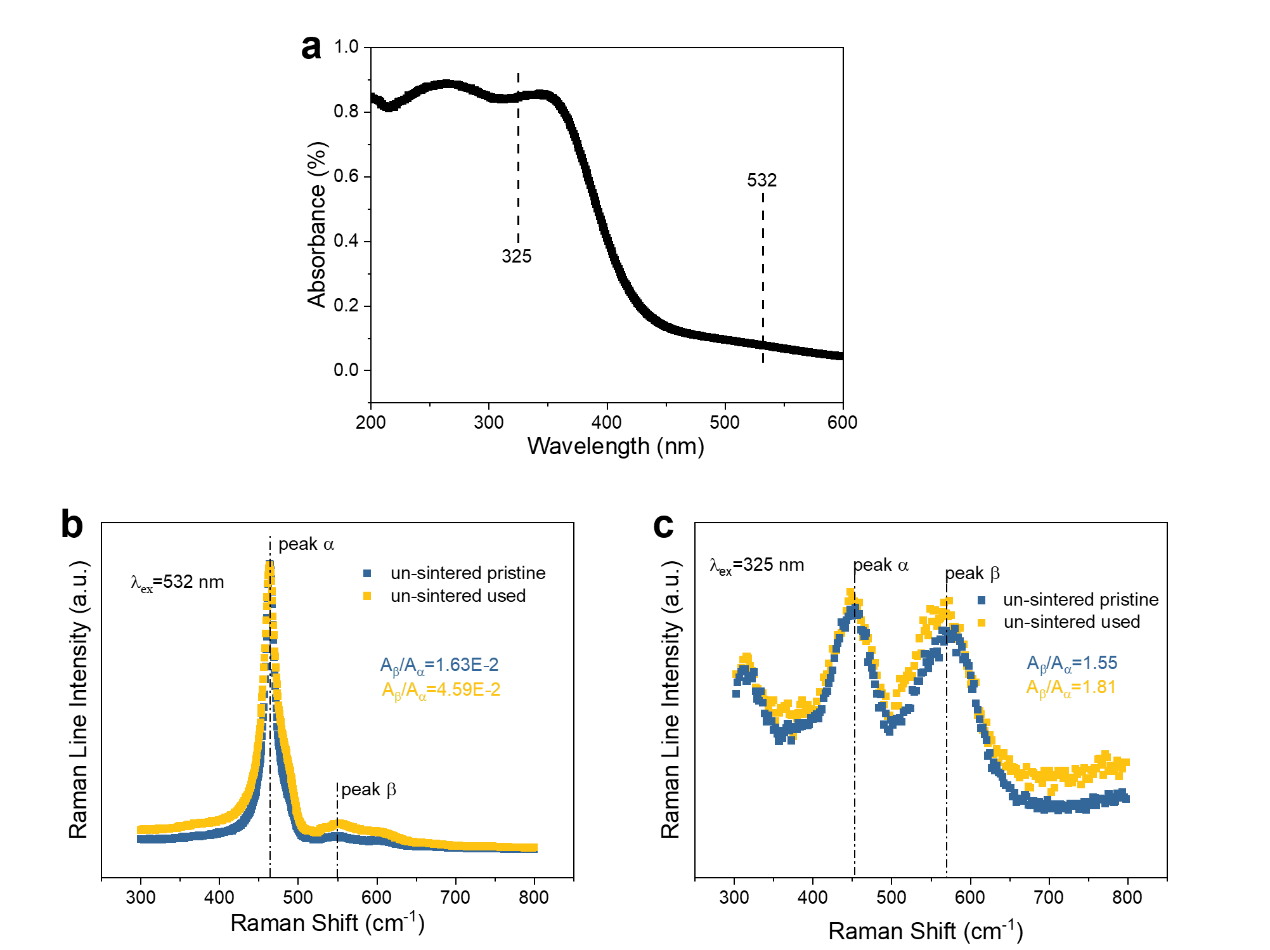


Supplementary Fig. 4**. UV-Visible Raman scattering analysis. a**, UV spectra of un-sintered GDC in the range of 200 nm to 600 nm.**b-c**, Raman spectra of un-sintered GDC before and after cell test with an excitation laser(**b**) and (**c**).


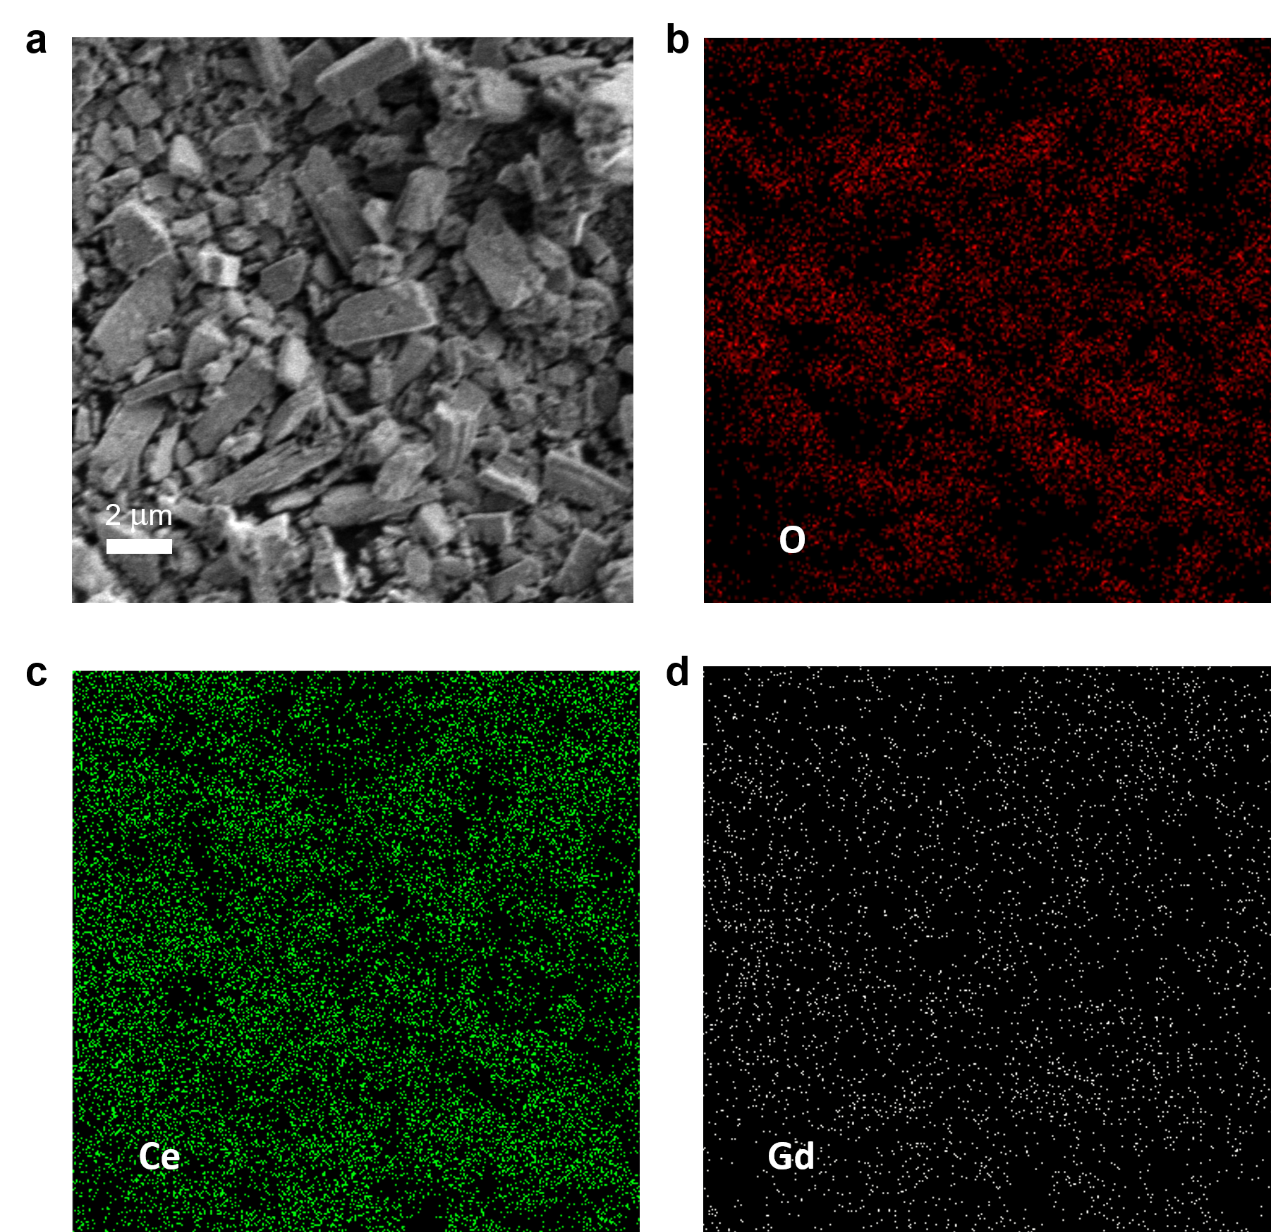


Supplementary Fig. 5. Scan electron microscopy (SEM) and energy dispersive spectroscopy (EDS) of fresh GDC particle. **a**, SEM image of GDC. GDC particles agglomerate with each other and form long sheets ranging in size from 1 µm to 7 µm. **b-d**, corresponding EDS elemental mapping for O (**b**), Ce(**c**),Gd(**d**). The uniform distribution proves that the Gd atoms are successfully doped in cerium oxide.


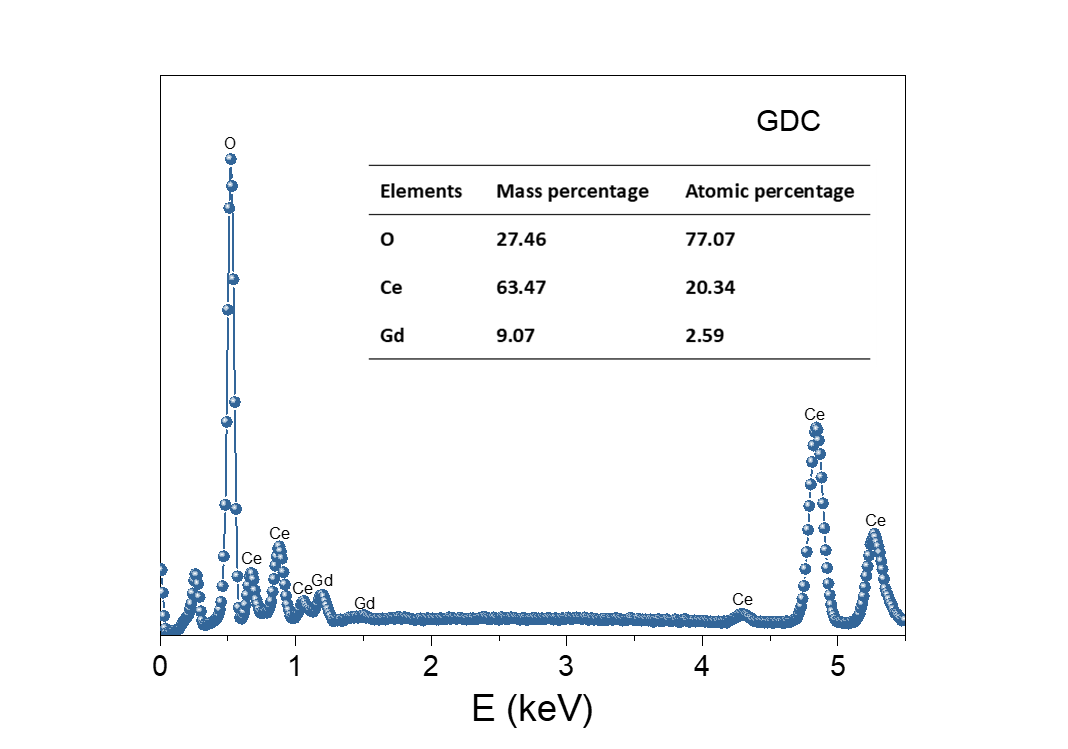


Supplementary Fig. 6**. Energy dispersive spectroscopy (EDS) of GDC.**


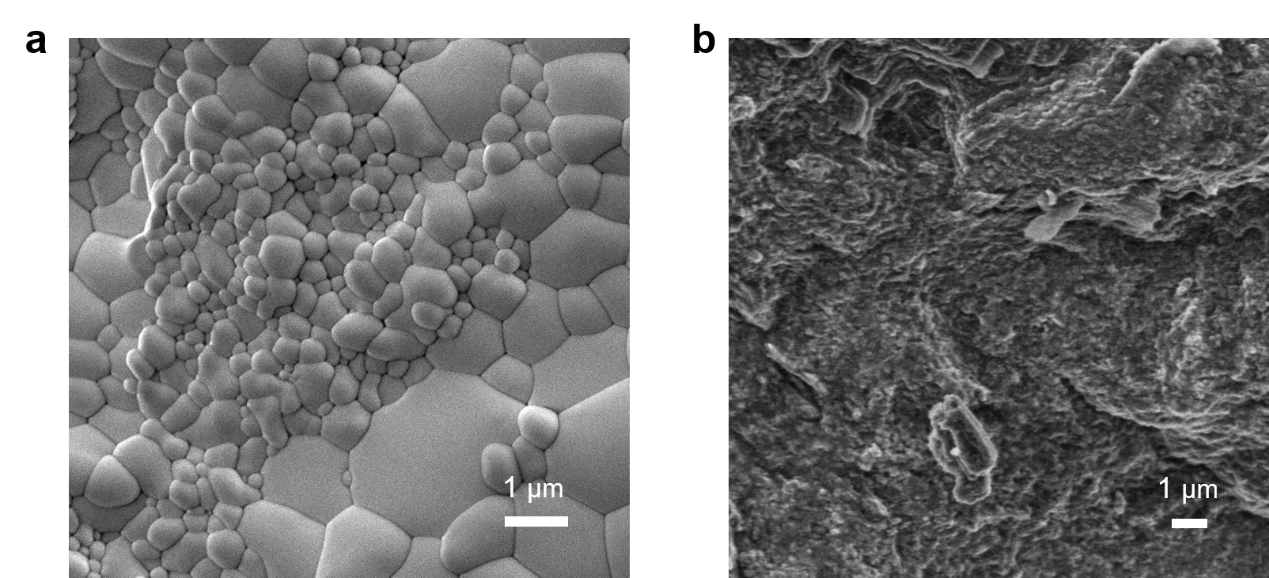


Supplementary Fig. 7**. SEM image of sintered and un-sintered GDC sheet. a-b**, SEM image of sintered GDC sheet’s surface (**a**), un-sintered GDC sheet’s surface (**b**). The sintered GDC sheet was completely dense and grain size is about from 0.3-3 μm. While un-sintered GDC sheet doesn’t show clear grain structure or clear powder like.

The un-sintered GDC pellet was pressed with a piece of Ni-NCAL to get a half-cell. The half-cell with a piece of Ni-NCAL, blank foam Ni stacked together to get a complete cell. The effective area of the cell is 0.64 cm2, and the thickness of the GDC layer is 0.4 mm.


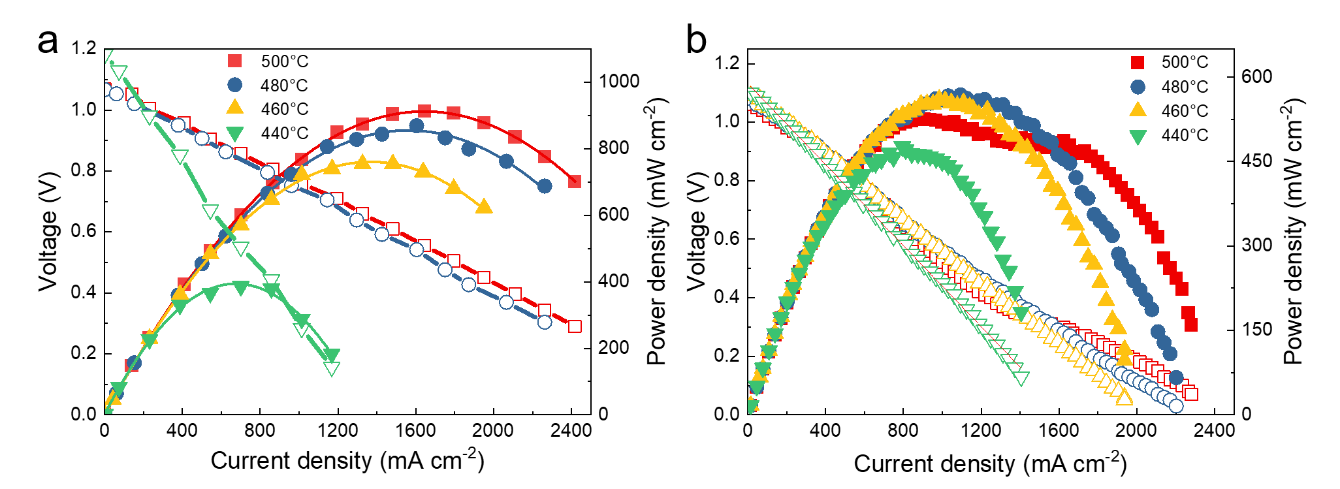


Supplementary Fig. 8**. Current density-Voltage-Power density curve of cells.** **a-b**, I-V-P curve of cells with GDC electrolyte (**a**) and CeO2 electrolyte layer (**b**). It is observed that peak power densities for the GDC electrolyte cell were 912.81 mW cm-2, 869.53 mW cm-2, 754.53 mW cm-2, and 386.25 mW cm-2 at 500°C, 480°C, 460°C and 440°C, respectively. For CeO2 electrolyte cell, peak power densities were 525.31 mW cm-2, 551.09 mW cm-2, 560.78 mW cm-2, and 476.88 mW cm-2 at 500 °C, 480 °C, 460°C and 440°C, respectively.

BZCY layers were applied as a proton filter attached on both sides of the GDC pellet.


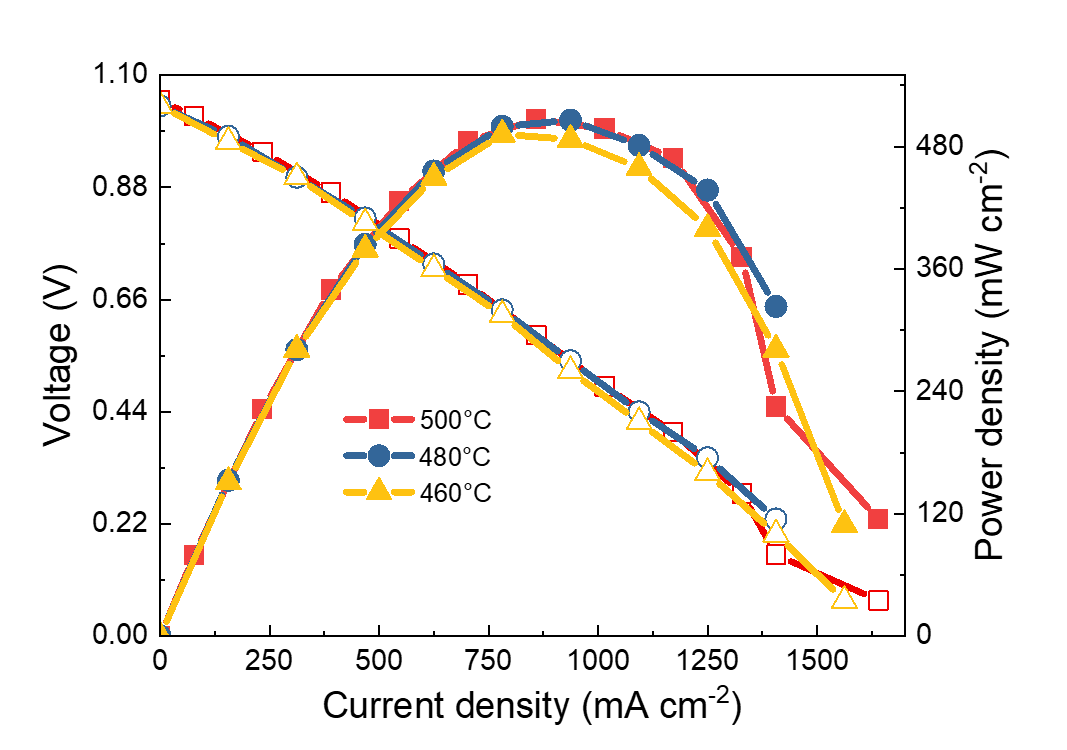


Supplementary Fig. 9**.** **I-V-P curve of GDC cell with BZCY filter layers.** It is demonstrated that peak power densities of 506.88, 505.94 and 492.03 mW cm-2 have been achieved at 500°C, 480°C and 460°C, respectively.


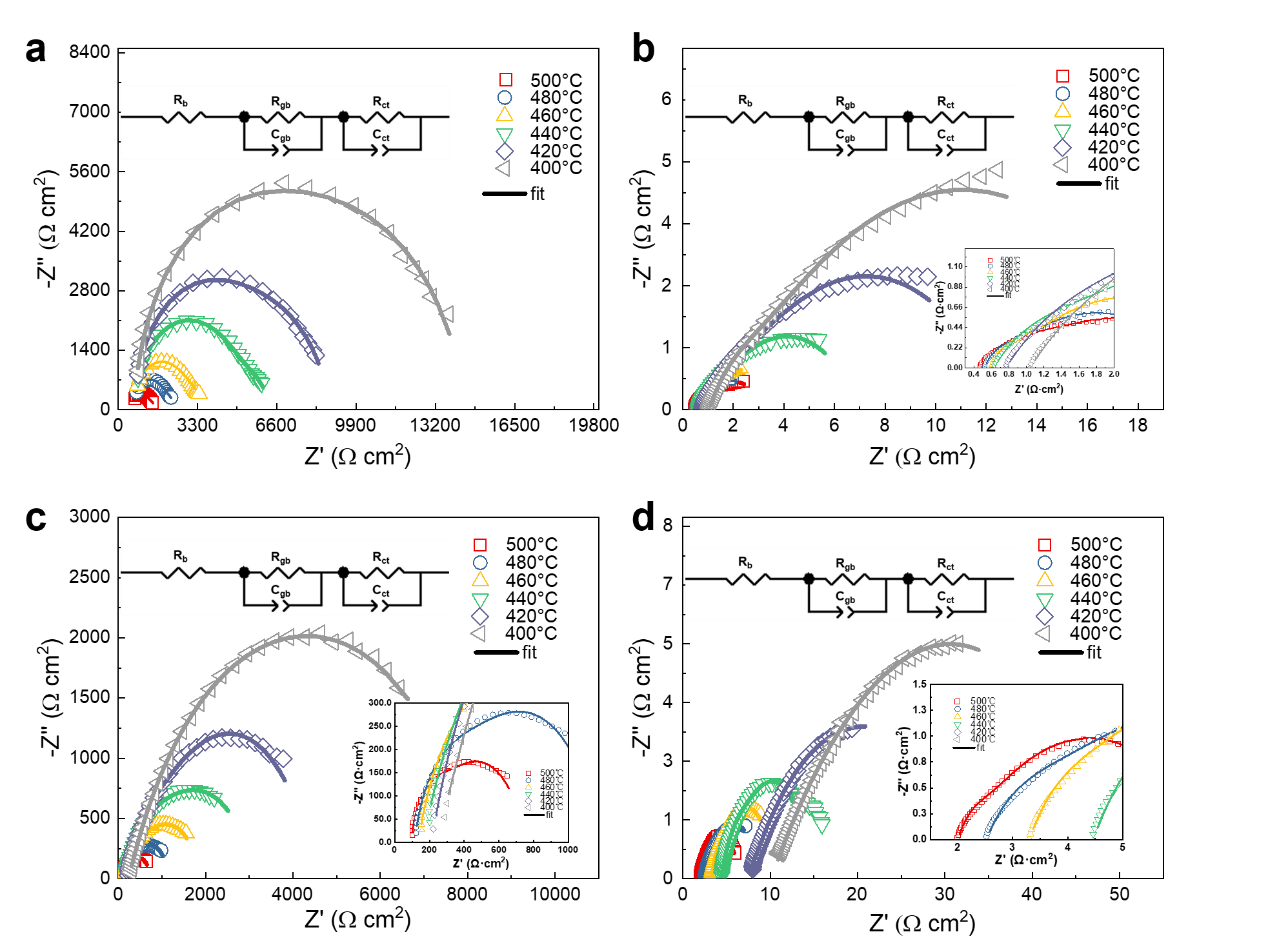


Supplementary Fig. 10**.** **Electrochemical impedance spectroscopy (EIS) of un-sintered and sintered GDC electrolyte cell.** **a-b**, EIS spectra of un-sintered GDC electrolyte cell in air atmosphere (**a**), and H2/air atmosphere (**b**). **c-d**, EIS spectra of sintered GDC electrolyte cell in air atmosphere (**c**), and H2/air atmosphere (**d**).


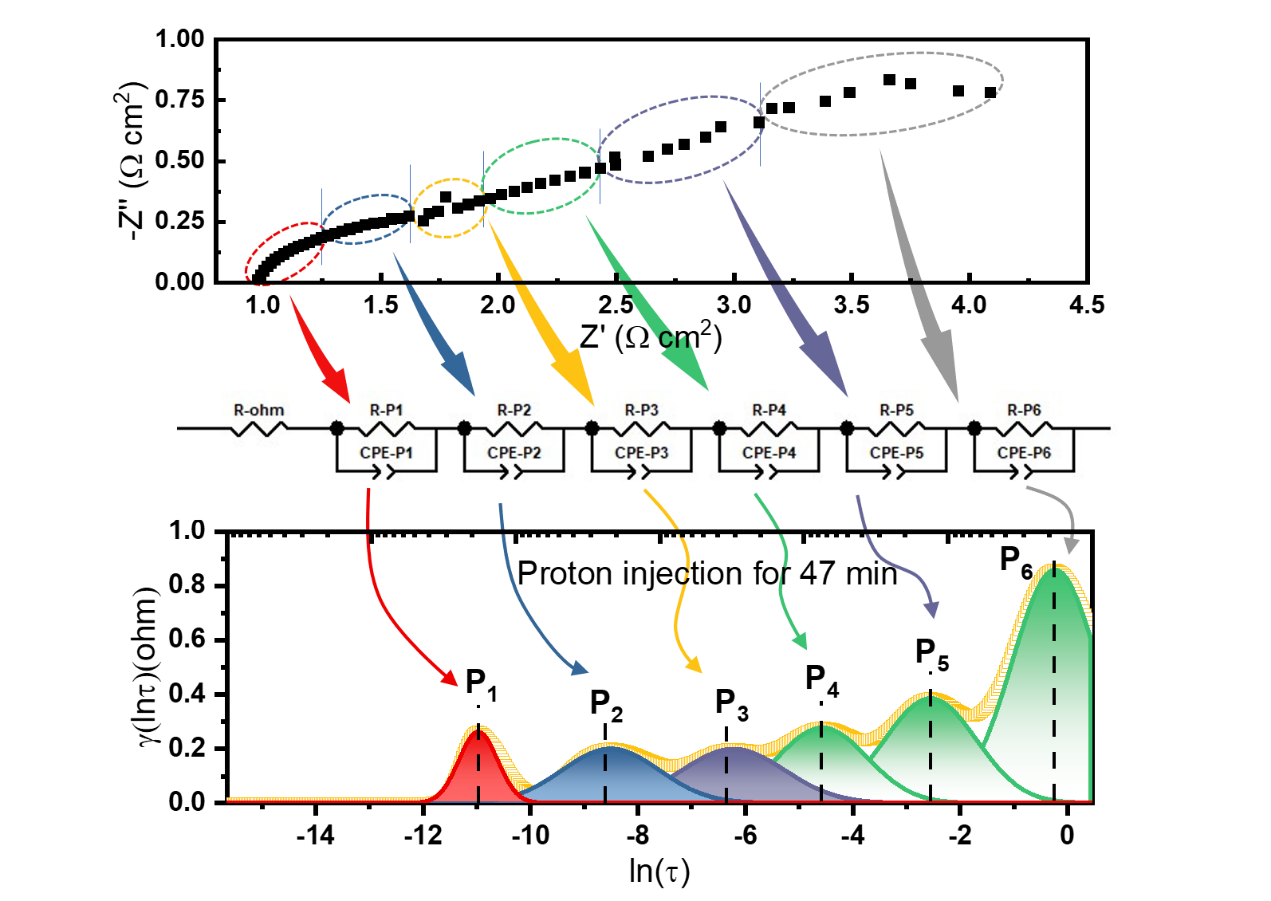


Supplementary Fig. 11**. Impedance diagrams, fit circuit and corresponding relaxation time distribution of GDC electrolyte cell after proton injection for 47 min.** DRT analysis allows more precise location fit capacitance in EIS.


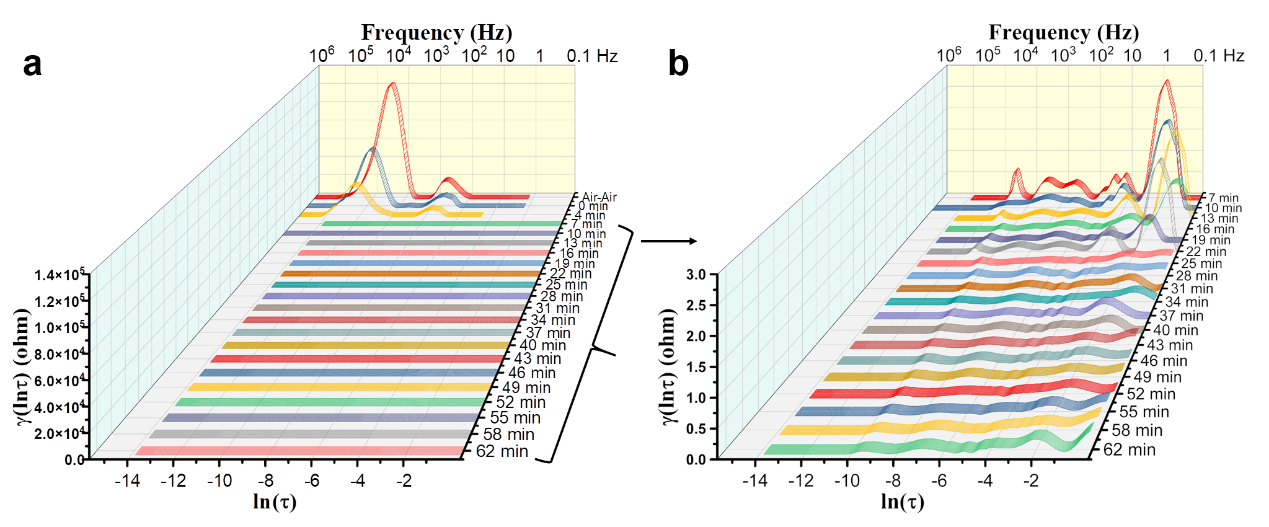


Supplementary Fig. 12**. The DRT results of CeO2-electrolyte cell.** **a-b**, The DRT results from air atmosphere to proton injection for 62 min (**a**) and with proton injection for 7 min to 62 min (**b**).


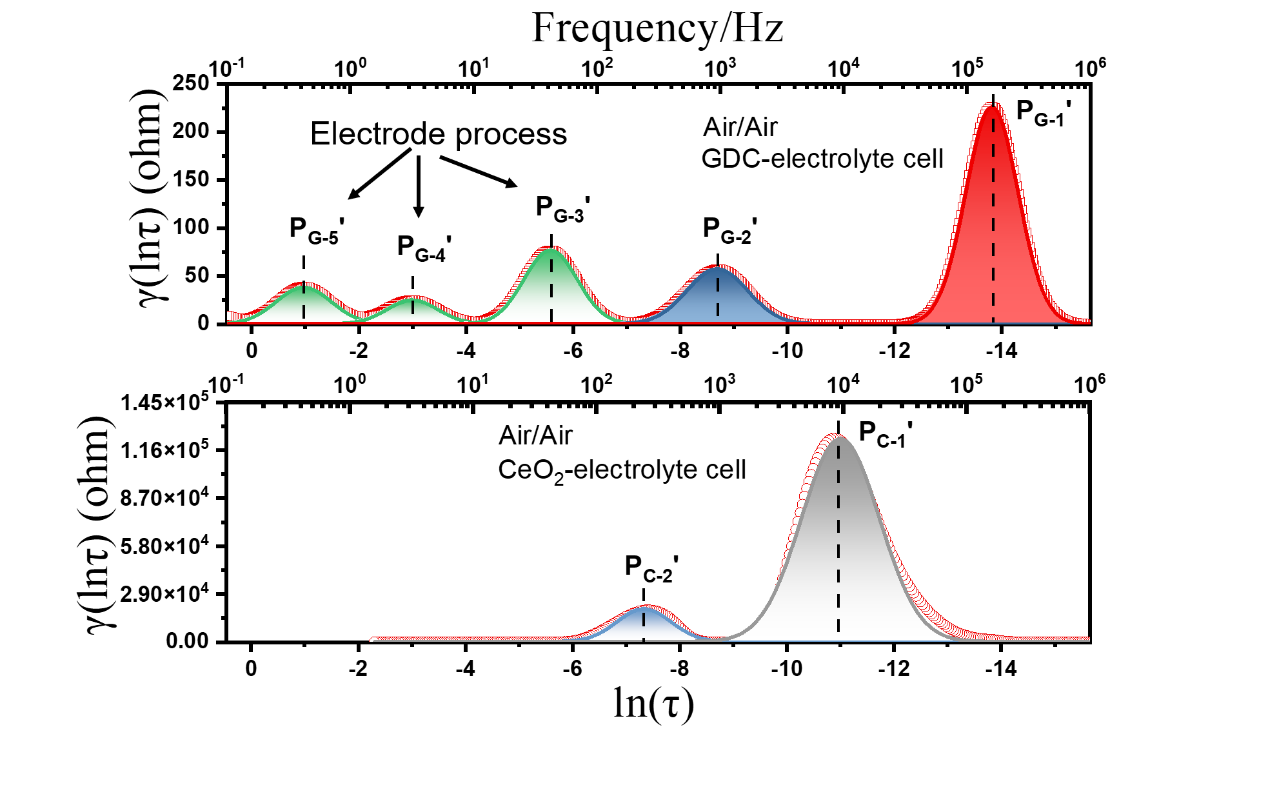


Supplementary Fig. 13**. The DRT result of GDC-electrolyte cell and CeO2-electrolyte cell in air atmosphere.** DRT results from GDC electrolyte in air atmosphere display 5 peaks, while only two clear wide peaks for CeO2 electrolyte. These two peaks may represent process of charge diffusion between electrodes and electrolyte. The intensity of the highest peak of PC-1’ is 1.24×105 Ω, about 550 times higher than that of peak PG-1’. It is indicative for the CeO2-electrolyte cell without oxygen ions conductivity.

Table S1**.** Bending energy values (eV) used during the fitting procedure of O 1s core level spectra for sintered and un-sintered GDC sheets.

| **Sample** | **Fit Components** | | |
| --- | --- | --- | --- |
|  | **Crystal lattice oxygen (OL)** | **O2- ions neighboring to Vo (OV)** | **Chemisorbed oxygen species** |
| Sintered GDC | 529.9 | 531.3 | 533.0 |
| Un-sintered GDC | 529.8 | 531.2 | 532.8 |

Table S2**.** Calculated bulk and grain boundary resistance of un-sintered and sintered GDC from EIS results as shown in **Fig. 1a**.

| **Resistance () (Air atmosphere, 500°C)** | **Bulk** | **Grain boundary** |
| --- | --- | --- |
| Un-sintered GDC | 659.1 | 1045 |
| Sintered GDC | 121.7 | 974.1 |

Table S3. Calculated conductivities from EIS spectra as shown in **Fig. 2a** for isotopic test.

| **Conductivity (S cm-1)** | **Air** | **D2O** | **H2O** |
| --- | --- | --- | --- |
|  | 1.2×10-4 | 2.1×10-4 | 1.55×10-3 |

Table S4. Corresponding Elementary Reaction of Each Peak in DRT Curves in air atmosphere (**Fig. 3e**)1-5.

| **Peak** | **Frequency range (Hz)** | **Reaction process** |
| --- | --- | --- |
| PG-1’ | 166995 | Charge transfer in electrodes |
| PG-2’ | 985 | Oxygen-ion transportation |
| PG-3’ | 42 | Electrode process of oxygen |
| PG-4’ | 3.3 |
| PG-5’ | 0.41 |

Table S5. Corresponding Elementary Reaction of Each Peak in DRT Curves in H2-air atmosphere (**Fig. 3f**-**Fig. 3h**).

| **Peak** | **Frequency range (Hz)** | **Reaction process** |
| --- | --- | --- |
| PG-1 | 1713-16924 | Proton transportation |
| PG-2 | 205-2718 | Oxygen-ion transportation |
| PG-3 | 22-243 | Electrode process of hydrogen |
| PG-4 | 2.4-31.6 | Electrode process of oxygen |
| PG-5 | 0.3-3.6 |
| PG-6 | 0.2 |

Table S6. Frequency and impedance of processes after proton injection for 47 min obtained from related EIS analysis (Supplementary Fig. 11).

|  | **P1** | **P2** | **P3** | **P4** | **P5** | **P6** |
| --- | --- | --- | --- | --- | --- | --- |
| Frequency (Hz) | 9266.5 | 800.0 | 95.5 | 14.9 | 2.1 | 0.2 |
| Impedance (Ω) | 0.24 | 0.46 | 0.48 | 0.58 | 0.83 | 1.72 |

Reference

1 Shi, N. *et al.* Performance and DRT analysis of P-SOFCs fabricated using new phase inversion combined tape casting technology. *J. Mater. Chem. A* **5**, 19664-19671 (2017).

2 Yu, S. *et al.* Enhancing the sinterability and electrical properties of BaZr0.1Ce0.7Y0.2O3- proton-conducting ceramic electrolyte. *J. Am. Ceram. Soc.* **104**, 329-342 (2021).

3 Guo, R. & He, T. High-Entropy Perovskite Electrolyte for Protonic Ceramic Fuel Cells Operating below 600 C. *ACS Mater. Lett.* **4**, 1646-1652 (2022).

4 Guo, R. *et al.* Sn–Dy–Cu Triply Doped BaZr0.1Ce0.7Y0.2O3−: A Chemically Stable and Highly Proton-Conductive Electrolyte for Low-Temperature Solid Oxide Fuel Cells. *ACS Sustainable Chem. Eng.* **10**, 5352-5362 (2022).

5 Wang, J. P. *et al.* BaZr0.1Fe0.9-xNixO3- cubic perovskite oxides for protonic ceramic fuel cell cathodes. *Int. J. Hydrogen Energy* **47**, 9395-9407 (2022).
